# Supplementary material for: Exploring the role of non-coding RNAs as potential candidate biomarkers in the cross-talk between diabetes mellitus and Alzheimer’s disease
Source: Front Aging Neurosci. 2022 Aug 24;14:955461. doi: 10.3389/fnagi.2022.955461 (PMC9451601; doi:10.3389/fnagi.2022.955461)
Supplement: Supplementary file 2 [file Table_2.XLSX]

## Sheet: protein-miRNA interactions
miRNA	APOC1	APOE	HLA-C	HLA-DQA1	HLA-DRB1	NECTIN2	TOMM40
hsa-miR-199a-5p	1	0	0	1	0	1	1
hsa-miR-199b-5p	1	0	0	1	0	1	1
hsa-miR-423-5p	0	0	1	1	0	1	1
hsa-miR-3184-5p	0	0	1	1	0	1	1
hsa-miR-124-3p	1	0	0	1	0	1	0
hsa-miR-506-3p	1	0	0	1	0	1	0
hsa-miR-1321	1	0	0	0	1	1	0
hsa-miR-4731-5p	1	0	0	0	0	1	1
hsa-miR-491-5p	0	1	1	0	0	1	0
hsa-miR-663a	0	1	0	0	0	1	1
hsa-miR-744-5p	0	1	0	0	0	1	1
hsa-miR-665	0	1	0	0	0	1	1
hsa-miR-1286	0	1	0	0	1	1	0
hsa-miR-1908-5p	0	1	0	0	0	1	1
hsa-miR-873-5p	0	0	1	0	0	1	1
hsa-miR-21-5p	1	0	0	1	0	0	0
hsa-miR-590-5p	1	0	0	1	0	0	0
hsa-miR-184	0	1	0	0	0	0	1
hsa-miR-650	0	1	0	0	0	1	0
hsa-miR-193a-5p	0	1	0	0	0	1	0
hsa-miR-3612	0	1	0	0	0	1	0
hsa-miR-199a-3p	0	1	0	0	0	1	0
hsa-miR-143-3p	0	0	1	0	0	0	1
hsa-miR-185-5p	0	0	1	0	0	1	0
hsa-miR-376a-3p	0	0	1	0	0	1	0
hsa-miR-382-5p	0	0	1	1	0	0	0
hsa-miR-326	0	0	1	0	0	1	0
hsa-miR-376b-3p	0	0	1	0	0	1	0
hsa-miR-485-5p	0	0	1	0	0	1	0
hsa-miR-515-5p	0	0	1	0	0	0	1
hsa-miR-516b-5p	0	0	1	0	0	1	0
hsa-miR-654-5p	0	0	1	0	0	1	0
hsa-miR-219a-2-3p	0	0	1	0	0	1	0
hsa-miR-330-5p	0	0	1	0	0	1	0
hsa-miR-541-3p	0	0	1	0	0	1	0
hsa-miR-760	0	0	1	0	0	1	0
hsa-miR-513b-5p	0	0	1	0	0	1	0
hsa-miR-1301-3p	0	0	1	0	0	1	0
hsa-miR-1306-5p	0	0	1	0	0	1	0
hsa-miR-6088	0	0	1	0	0	0	1
hsa-miR-15a-5p	0	0	0	1	0	1	0
hsa-miR-16-5p	0	0	0	1	0	1	0
hsa-miR-29a-3p	0	0	0	1	0	1	0
hsa-miR-29b-3p	0	0	0	1	0	1	0
hsa-miR-15b-5p	0	0	0	1	0	1	0
hsa-miR-195-5p	0	0	0	1	0	1	0
hsa-miR-29c-3p	0	0	0	1	0	1	0
hsa-miR-424-5p	0	0	0	1	0	1	0
hsa-miR-433-3p	0	0	0	1	0	1	0
hsa-miR-497-5p	0	0	0	1	0	1	0
hsa-miR-503-5p	0	0	0	1	0	1	0
hsa-miR-641	0	0	0	1	0	1	0
hsa-miR-3150b-3p	0	0	0	1	0	0	1
hsa-miR-4784	0	0	0	1	0	0	1
hsa-miR-671-5p	0	0	0	0	1	0	1
hsa-miR-4756-5p	0	0	0	0	1	0	1
hsa-miR-17-5p	0	0	0	0	0	1	1
hsa-miR-20a-5p	0	0	0	0	0	1	1
hsa-miR-24-3p	0	0	0	0	0	1	1
hsa-miR-93-5p	0	0	0	0	0	1	1
hsa-miR-106a-5p	0	0	0	0	0	1	1
hsa-miR-106b-5p	0	0	0	0	0	1	1
hsa-miR-370-3p	0	0	0	0	0	1	1
hsa-miR-20b-5p	0	0	0	0	0	1	1
hsa-miR-483-3p	0	0	0	0	0	1	1
hsa-miR-519d-3p	0	0	0	0	0	1	1
hsa-miR-510-5p	0	0	0	0	0	1	1
hsa-miR-625-5p	0	0	0	0	0	1	1
hsa-miR-361-3p	0	0	0	0	0	1	1
hsa-miR-340-5p	0	0	0	0	0	1	1
hsa-miR-942-5p	0	0	0	0	0	1	1
hsa-miR-378g	0	0	0	0	0	1	1
hsa-miR-4640-5p	0	0	0	0	0	1	1
hsa-miR-4726-5p	0	0	0	0	0	1	1
hsa-miR-5010-5p	0	0	0	0	0	1	1
hsa-miR-205-5p	1	0	0	0	0	0	0
hsa-miR-615-3p	1	0	0	0	0	0	0
hsa-miR-1343-3p	1	0	0	0	0	0	0
hsa-miR-23a-3p	0	0	1	0	0	0	0
hsa-miR-95-3p	0	0	1	0	0	0	0
hsa-miR-148a-3p	0	0	1	0	0	0	0
hsa-miR-181a-5p	0	0	1	0	0	0	0
hsa-miR-181b-5p	0	0	1	0	0	0	0
hsa-miR-181c-5p	0	0	1	0	0	0	0
hsa-miR-223-3p	0	0	1	0	0	0	0
hsa-miR-224-5p	0	0	1	0	0	0	0
hsa-miR-23b-3p	0	0	1	0	0	0	0
hsa-miR-130a-3p	0	0	1	0	0	0	0
hsa-miR-152-3p	0	0	1	0	0	0	0
hsa-miR-146a-5p	0	0	1	0	0	0	0
hsa-miR-301a-3p	0	0	1	0	0	0	0
hsa-miR-130b-3p	0	0	1	0	0	0	0
hsa-miR-342-3p	0	0	1	0	0	0	0
hsa-miR-323a-3p	0	0	1	0	0	0	0
hsa-miR-148b-3p	0	0	1	0	0	0	0
hsa-miR-146b-5p	0	0	1	0	0	0	0
hsa-miR-181d-5p	0	0	1	0	0	0	0
hsa-miR-526b-5p	0	0	1	0	0	0	0
hsa-miR-493-3p	0	0	1	0	0	0	0
hsa-miR-552-3p	0	0	1	0	0	0	0
hsa-miR-580-3p	0	0	1	0	0	0	0
hsa-miR-620	0	0	1	0	0	0	0
hsa-miR-454-3p	0	0	1	0	0	0	0
hsa-miR-455-3p	0	0	1	0	0	0	0
hsa-miR-589-5p	0	0	1	0	0	0	0
hsa-miR-450b-5p	0	0	1	0	0	0	0
hsa-miR-301b-3p	0	0	1	0	0	0	0
hsa-miR-513c-5p	0	0	1	0	0	0	0
hsa-miR-1270	0	0	1	0	0	0	0
hsa-miR-1276	0	0	1	0	0	0	0
hsa-miR-3127-5p	0	0	1	0	0	0	0
hsa-miR-5047	0	0	1	0	0	0	0
hsa-miR-5586-5p	0	0	1	0	0	0	0
hsa-miR-506-5p	0	0	1	0	0	0	0
hsa-miR-6512-3p	0	0	1	0	0	0	0
hsa-miR-18a-5p	0	0	0	1	0	0	0
hsa-miR-141-3p	0	0	0	1	0	0	0
hsa-miR-186-5p	0	0	0	1	0	0	0
hsa-miR-200a-3p	0	0	0	1	0	0	0
hsa-miR-380-3p	0	0	0	1	0	0	0
hsa-miR-328-3p	0	0	0	1	0	0	0
hsa-miR-18b-5p	0	0	0	1	0	0	0
hsa-miR-432-5p	0	0	0	1	0	0	0
hsa-miR-758-3p	0	0	0	1	0	0	0
hsa-miR-140-3p	0	0	0	1	0	0	0
hsa-miR-1914-3p	0	0	0	1	0	0	0
hsa-miR-4524a-5p	0	0	0	1	0	0	0
hsa-miR-5194	0	0	0	1	0	0	0
hsa-miR-4524b-5p	0	0	0	1	0	0	0
hsa-miR-136-5p	0	0	0	0	1	0	0
hsa-miR-494-3p	0	0	0	0	1	0	0
hsa-miR-3139	0	0	0	0	1	0	0
hsa-miR-4739	0	0	0	0	1	0	0
hsa-miR-4761-3p	0	0	0	0	1	0	0
hsa-let-7a-5p	0	0	0	0	0	1	0
hsa-let-7b-5p	0	0	0	0	0	1	0
hsa-let-7c-5p	0	0	0	0	0	1	0
hsa-let-7d-5p	0	0	0	0	0	1	0
hsa-let-7e-5p	0	0	0	0	0	1	0
hsa-let-7f-5p	0	0	0	0	0	1	0
hsa-miR-27a-3p	0	0	0	0	0	1	0
hsa-miR-31-5p	0	0	0	0	0	1	0
hsa-miR-98-5p	0	0	0	0	0	1	0
hsa-miR-101-3p	0	0	0	0	0	1	0
hsa-miR-103a-3p	0	0	0	0	0	1	0
hsa-miR-105-5p	0	0	0	0	0	1	0
hsa-miR-107	0	0	0	0	0	1	0
hsa-miR-196a-5p	0	0	0	0	0	1	0
hsa-miR-10a-5p	0	0	0	0	0	1	0
hsa-miR-10b-5p	0	0	0	0	0	1	0
hsa-miR-34a-5p	0	0	0	0	0	1	0
hsa-miR-212-3p	0	0	0	0	0	1	0
hsa-miR-214-3p	0	0	0	0	0	1	0
hsa-miR-218-5p	0	0	0	0	0	1	0
hsa-let-7g-5p	0	0	0	0	0	1	0
hsa-let-7i-5p	0	0	0	0	0	1	0
hsa-miR-1-3p	0	0	0	0	0	1	0
hsa-miR-27b-3p	0	0	0	0	0	1	0
hsa-miR-128-3p	0	0	0	0	0	1	0
hsa-miR-132-3p	0	0	0	0	0	1	0
hsa-miR-144-3p	0	0	0	0	0	1	0
hsa-miR-145-5p	0	0	0	0	0	1	0
hsa-miR-153-3p	0	0	0	0	0	1	0
hsa-miR-149-5p	0	0	0	0	0	1	0
hsa-miR-150-5p	0	0	0	0	0	1	0
hsa-miR-154-5p	0	0	0	0	0	1	0
hsa-miR-206	0	0	0	0	0	1	0
hsa-miR-34b-5p	0	0	0	0	0	1	0
hsa-miR-34c-5p	0	0	0	0	0	1	0
hsa-miR-379-5p	0	0	0	0	0	1	0
hsa-miR-383-5p	0	0	0	0	0	1	0
hsa-miR-337-3p	0	0	0	0	0	1	0
hsa-miR-338-3p	0	0	0	0	0	1	0
hsa-miR-339-5p	0	0	0	0	0	1	0
hsa-miR-196b-5p	0	0	0	0	0	1	0
hsa-miR-448	0	0	0	0	0	1	0
hsa-miR-449a	0	0	0	0	0	1	0
hsa-miR-520a-5p	0	0	0	0	0	1	0
hsa-miR-525-5p	0	0	0	0	0	1	0
hsa-miR-524-5p	0	0	0	0	0	1	0
hsa-miR-520d-5p	0	0	0	0	0	1	0
hsa-miR-520g-3p	0	0	0	0	0	1	0
hsa-miR-520h	0	0	0	0	0	1	0
hsa-miR-522-3p	0	0	0	0	0	1	0
hsa-miR-513a-5p	0	0	0	0	0	1	0
hsa-miR-577	0	0	0	0	0	1	0
hsa-miR-584-5p	0	0	0	0	0	1	0
hsa-miR-588	0	0	0	0	0	1	0
hsa-miR-613	0	0	0	0	0	1	0
hsa-miR-449b-5p	0	0	0	0	0	1	0
hsa-miR-199b-3p	0	0	0	0	0	1	0
hsa-miR-129-2-3p	0	0	0	0	0	1	0
hsa-miR-483-5p	0	0	0	0	0	1	0
hsa-miR-532-3p	0	0	0	0	0	1	0
hsa-miR-545-5p	0	0	0	0	0	1	0
hsa-miR-885-5p	0	0	0	0	0	1	0
hsa-miR-944	0	0	0	0	0	1	0
hsa-miR-1323	0	0	0	0	0	1	0
hsa-miR-1287-5p	0	0	0	0	0	1	0
hsa-miR-1295a	0	0	0	0	0	1	0
hsa-miR-548o-3p	0	0	0	0	0	1	0
hsa-miR-449c-5p	0	0	0	0	0	1	0
hsa-miR-2682-5p	0	0	0	0	0	1	0
hsa-miR-3129-5p	0	0	0	0	0	1	0
hsa-miR-3142	0	0	0	0	0	1	0
hsa-miR-3180-3p	0	0	0	0	0	1	0
hsa-miR-3196	0	0	0	0	0	1	0
hsa-miR-3180	0	0	0	0	0	1	0
hsa-miR-3529-5p	0	0	0	0	0	1	0
hsa-miR-1245b-5p	0	0	0	0	0	1	0
hsa-miR-212-5p	0	0	0	0	0	1	0
hsa-miR-6838-5p	0	0	0	0	0	1	0
hsa-miR-22-3p	0	0	0	0	0	0	1
hsa-miR-125b-5p	0	0	0	0	0	0	1
hsa-miR-9-5p	0	0	0	0	0	0	1
hsa-miR-125a-5p	0	0	0	0	0	0	1
hsa-miR-188-5p	0	0	0	0	0	0	1
hsa-miR-296-5p	0	0	0	0	0	0	1
hsa-miR-331-3p	0	0	0	0	0	0	1
hsa-miR-324-3p	0	0	0	0	0	0	1
hsa-miR-519e-5p	0	0	0	0	0	0	1
hsa-miR-525-3p	0	0	0	0	0	0	1
hsa-miR-524-3p	0	0	0	0	0	0	1
hsa-miR-551a	0	0	0	0	0	0	1
hsa-miR-551b-3p	0	0	0	0	0	0	1
hsa-miR-585-3p	0	0	0	0	0	0	1
hsa-miR-642a-5p	0	0	0	0	0	0	1
hsa-miR-151a-5p	0	0	0	0	0	0	1
hsa-miR-671-3p	0	0	0	0	0	0	1
hsa-miR-1185-5p	0	0	0	0	0	0	1
hsa-miR-1269a	0	0	0	0	0	0	1
hsa-miR-1197	0	0	0	0	0	0	1
hsa-miR-1913	0	0	0	0	0	0	1
hsa-miR-151b	0	0	0	0	0	0	1
hsa-miR-670-5p	0	0	0	0	0	0	1
hsa-miR-1193	0	0	0	0	0	0	1
hsa-miR-4319	0	0	0	0	0	0	1
hsa-miR-4525	0	0	0	0	0	0	1
